# Supplementary material for: Examination of differential glycoprotein preferences of N-acetylglucosaminyltransferase-IV isozymes a and b
Source: PubMed Central journal article supplement — J Biol Chem. 2022 Aug 18;298(9):102400. doi: 10.1016/j.jbc.2022.102400 (PMC9478453; doi:10.1016/j.jbc.2022.102400), 2022-08-18
Supplement: mmc1.pdf [file mmc1.pdf]

## Supporting Information

### Examination of differential glycoprotein preferences of *N*-acetylglucosaminyltransferase-IV isozymes a and b

**Naoko Osada, Masamichi Nagae, Miyako Nakano, Tetsuya Hirata, Yasuhiko Kizuka\***

\*Correspondence: Yasuhiko Kizuka, Ph.D., [kizuka@gifu-u.ac.jp](mailto:kizuka@gifu-u.ac.jp)

This Supporting information includes:

Figs. S1–S7 (included in this PDF)

Table S1-S4 (S1 and S4 are included in this PDF. S2 and S3 are separate files)

Figure S1

A

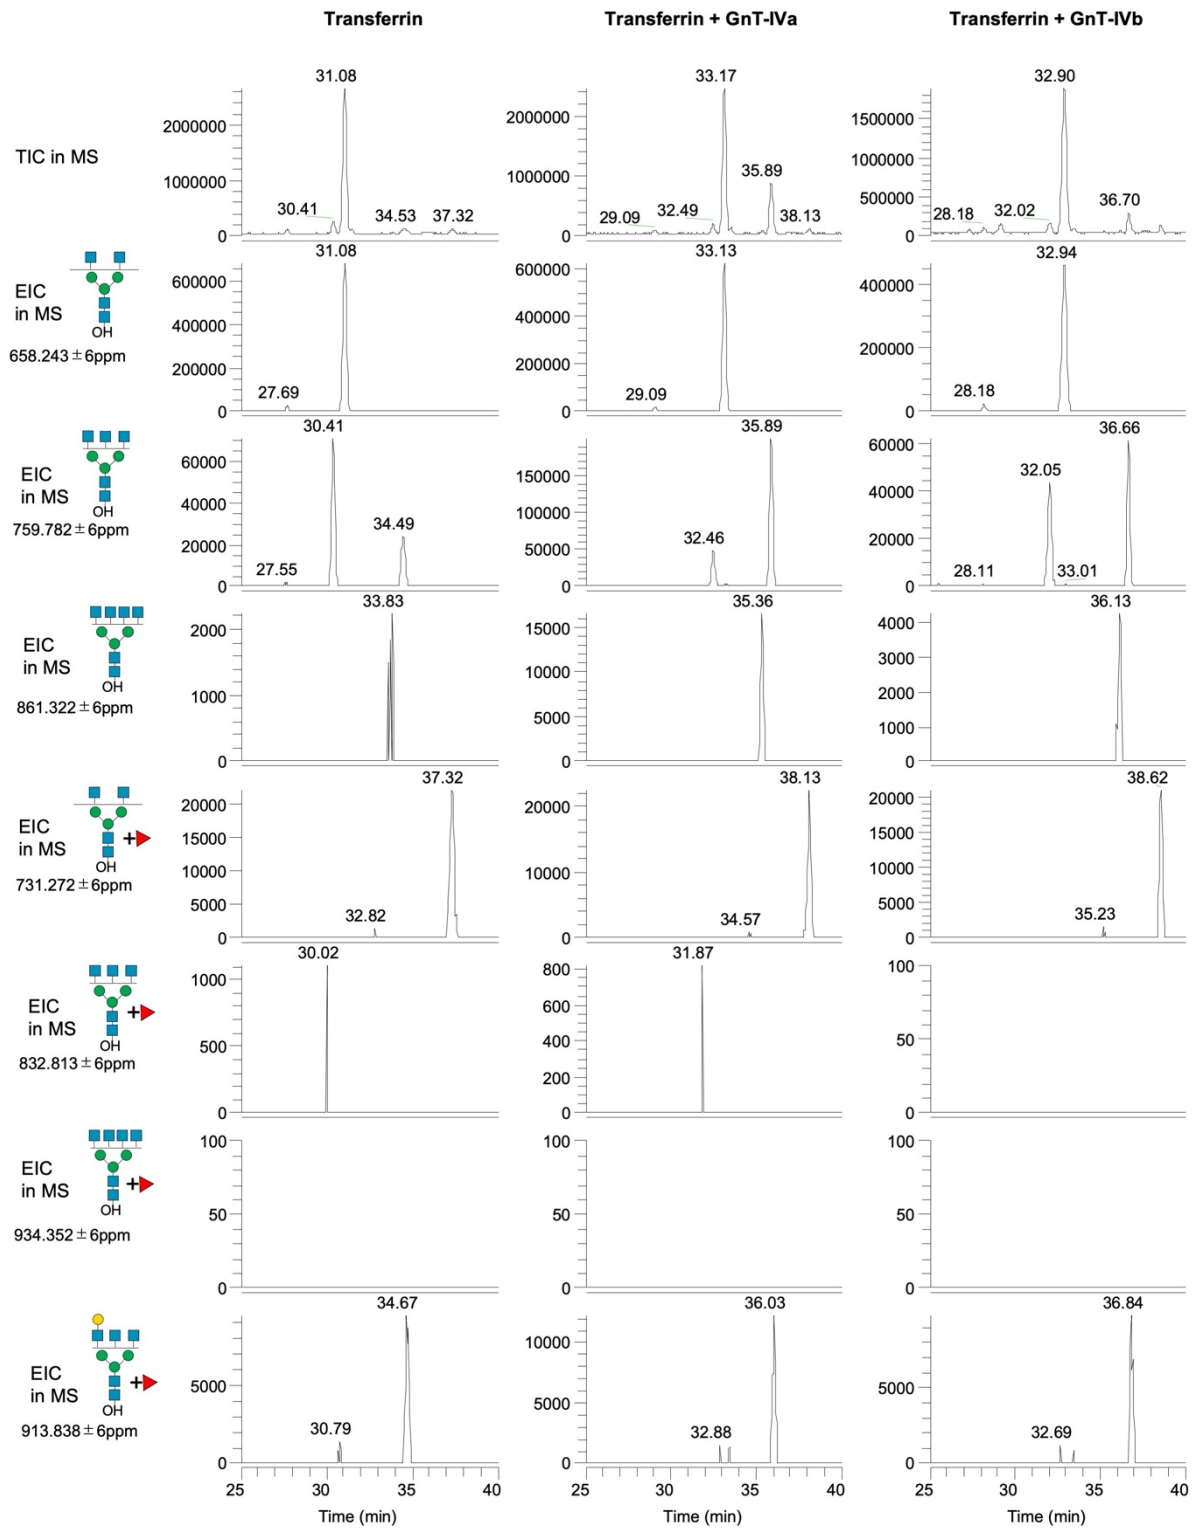

**B**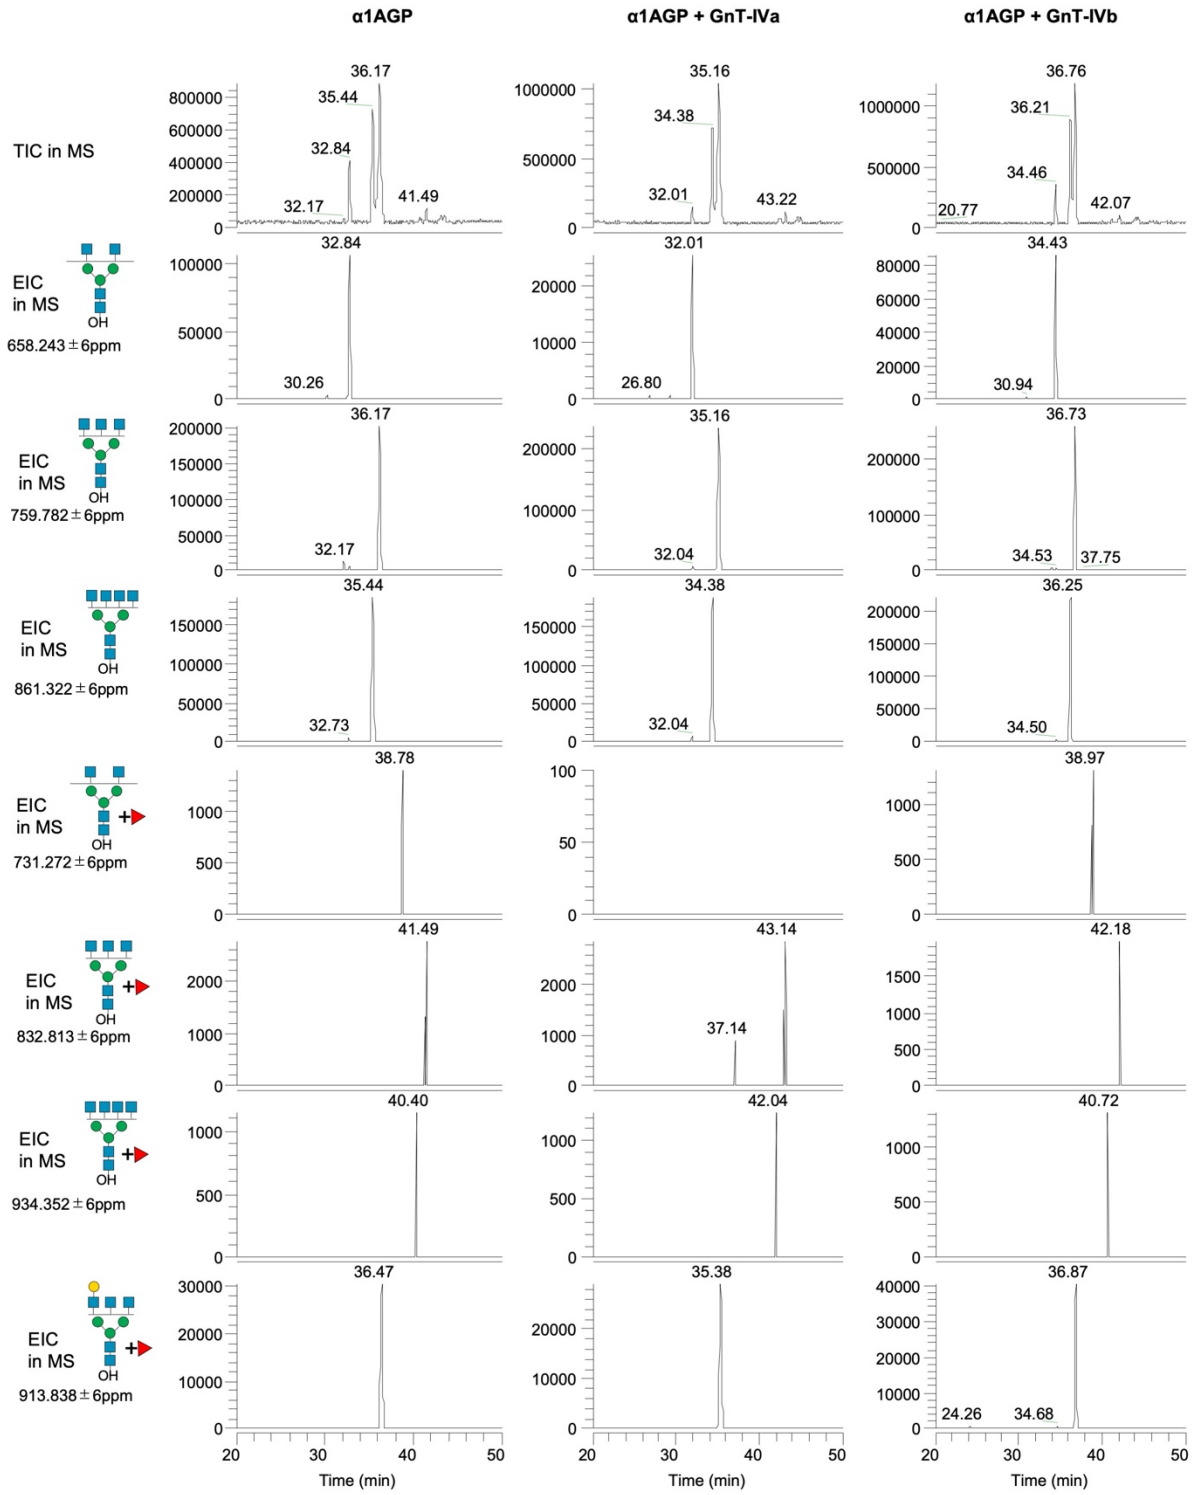

C

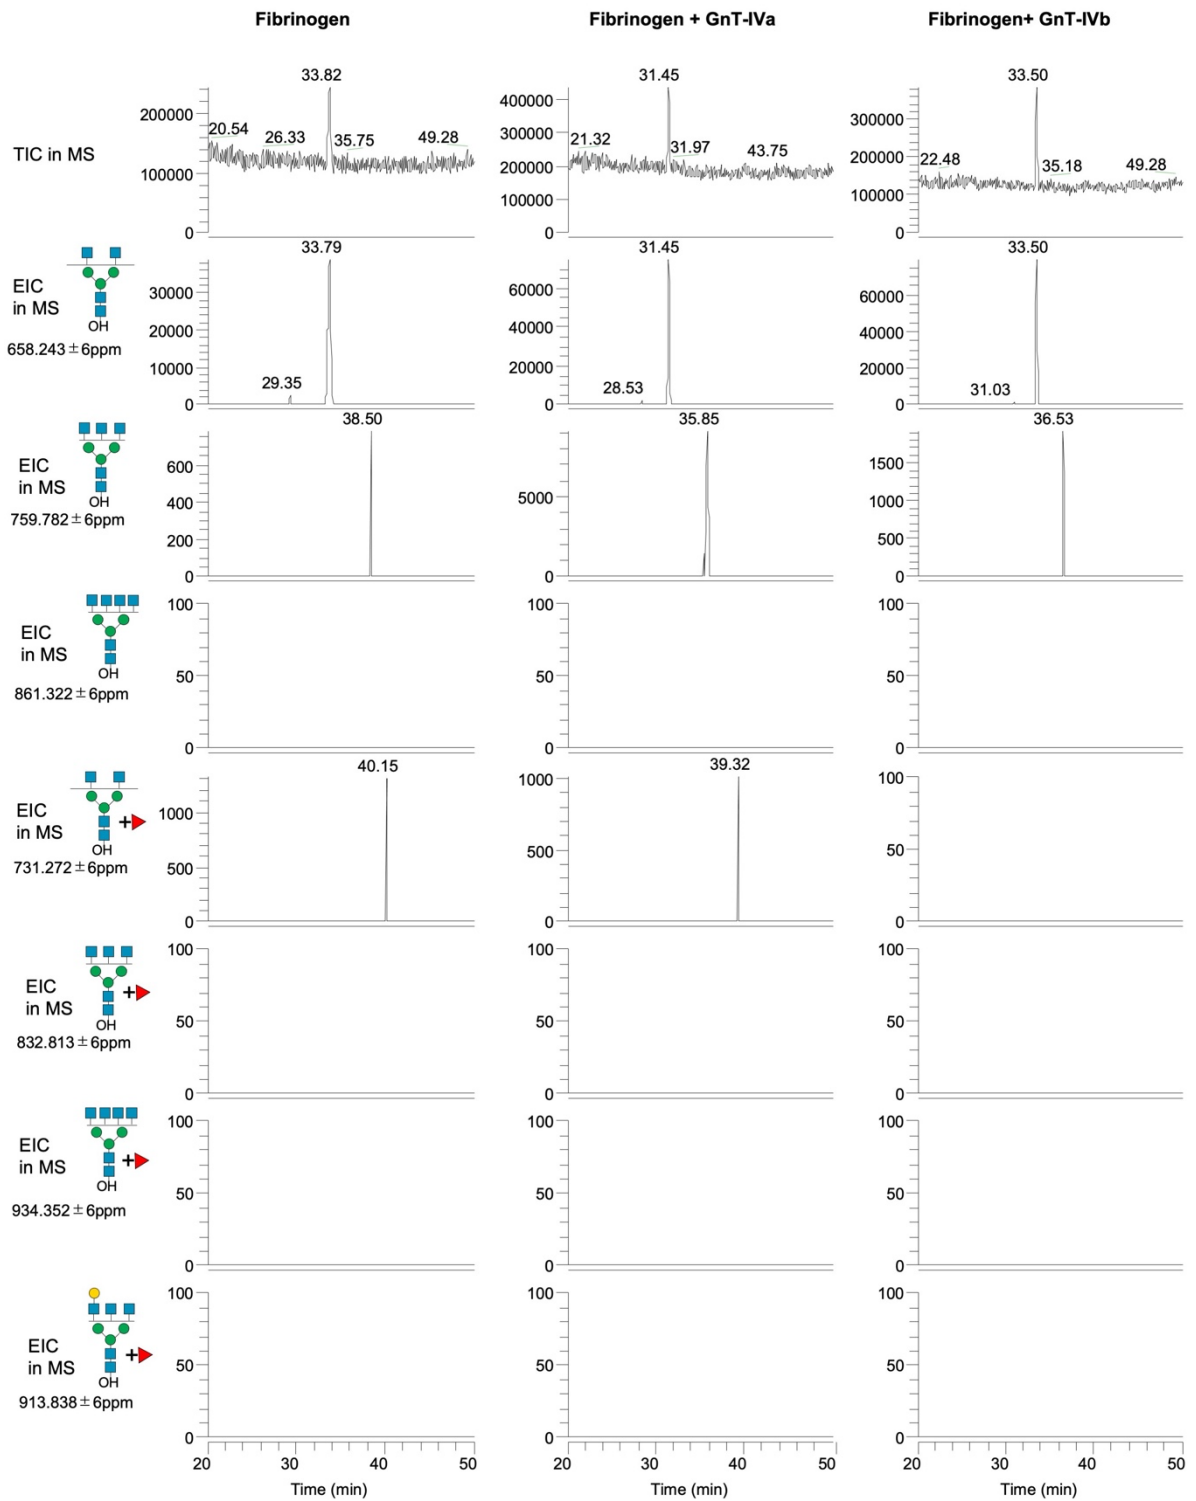

D

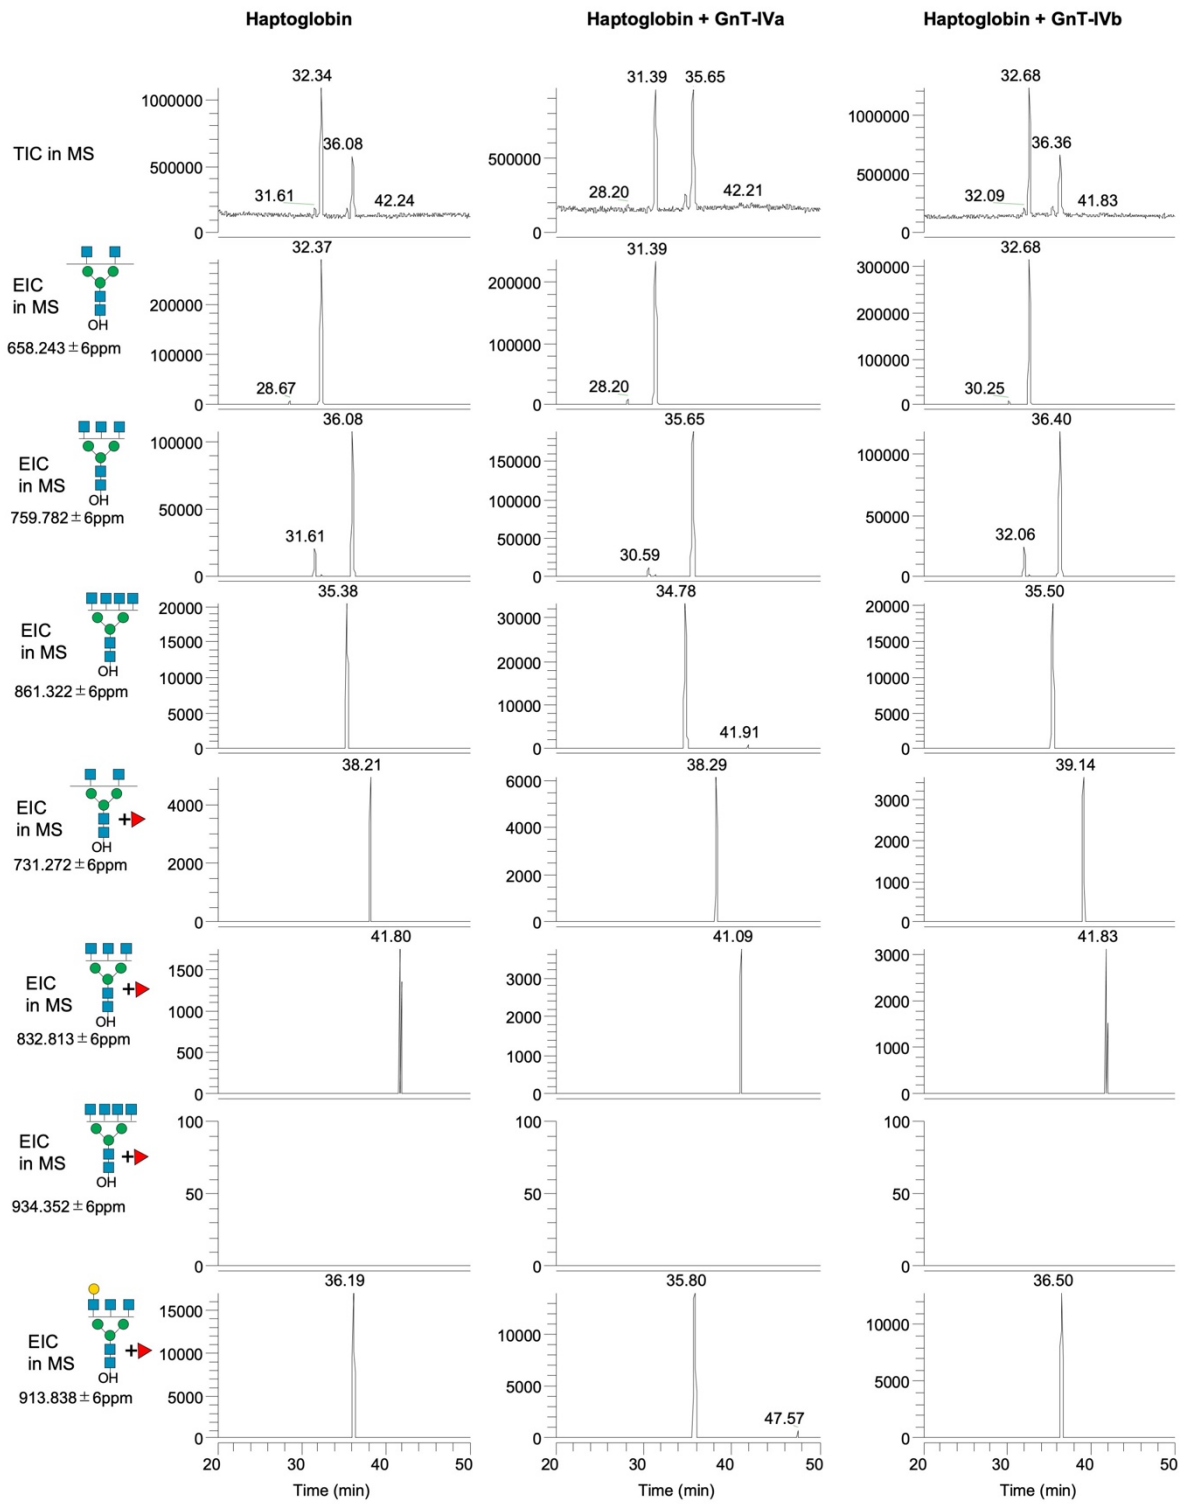

E

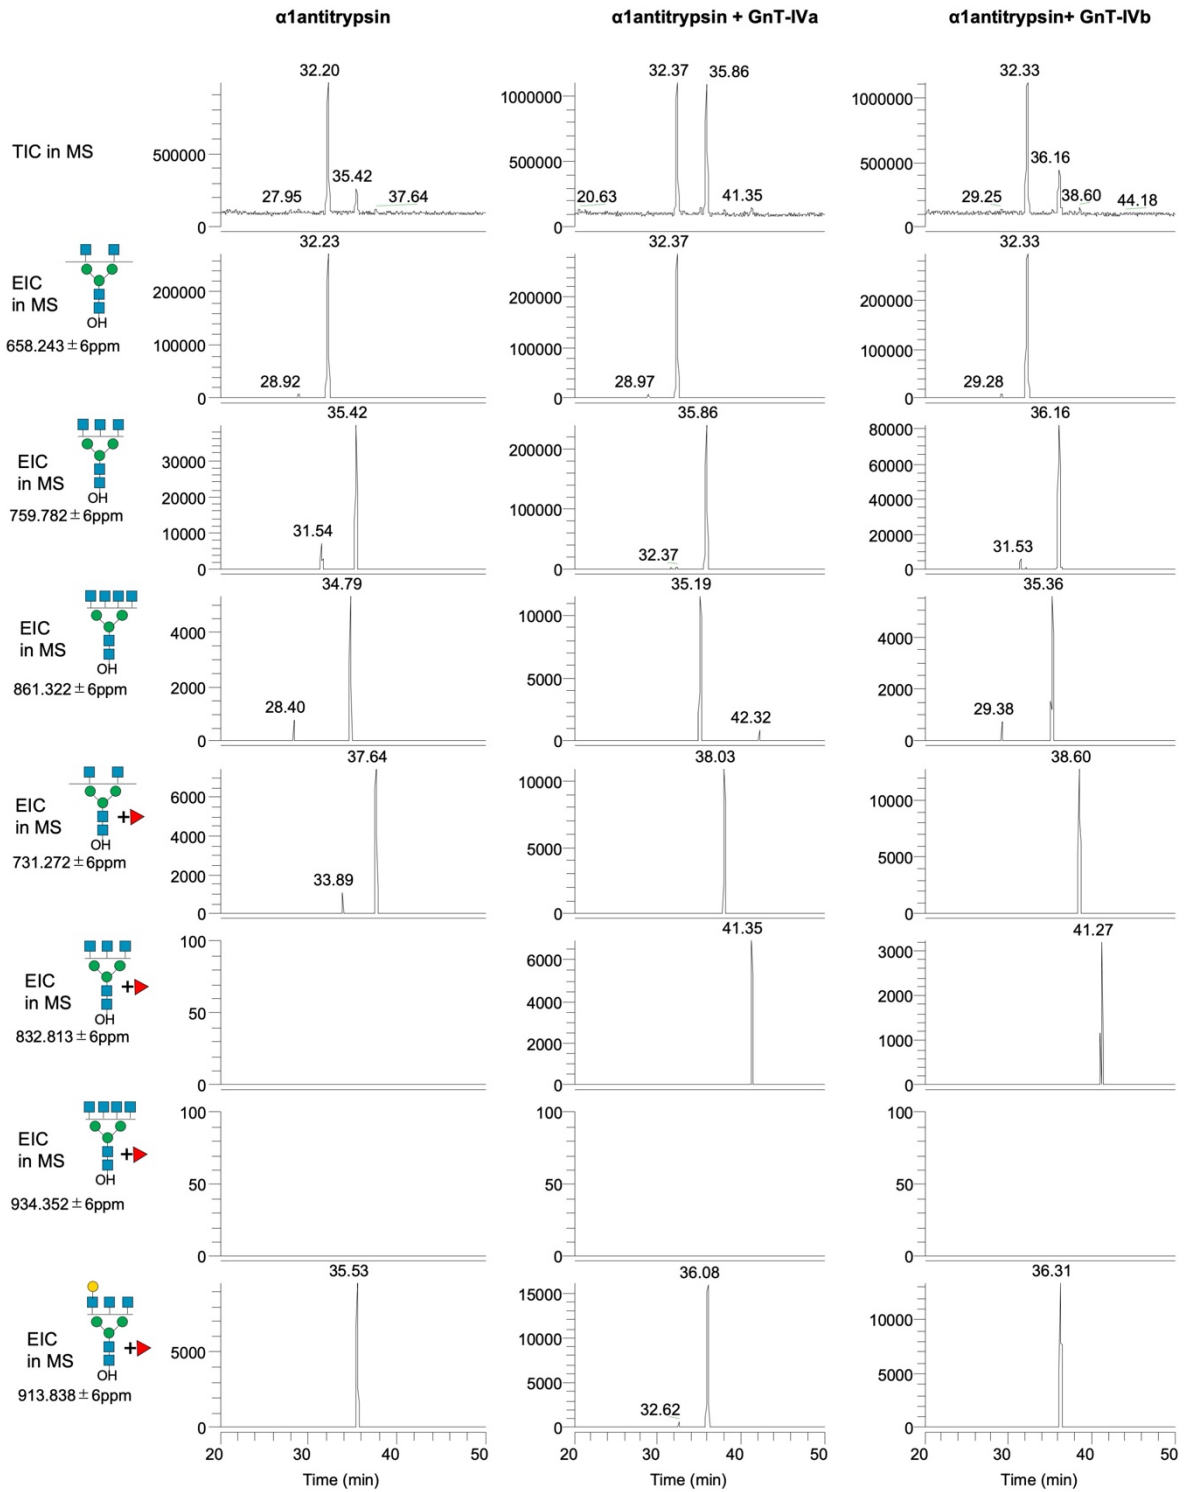

F

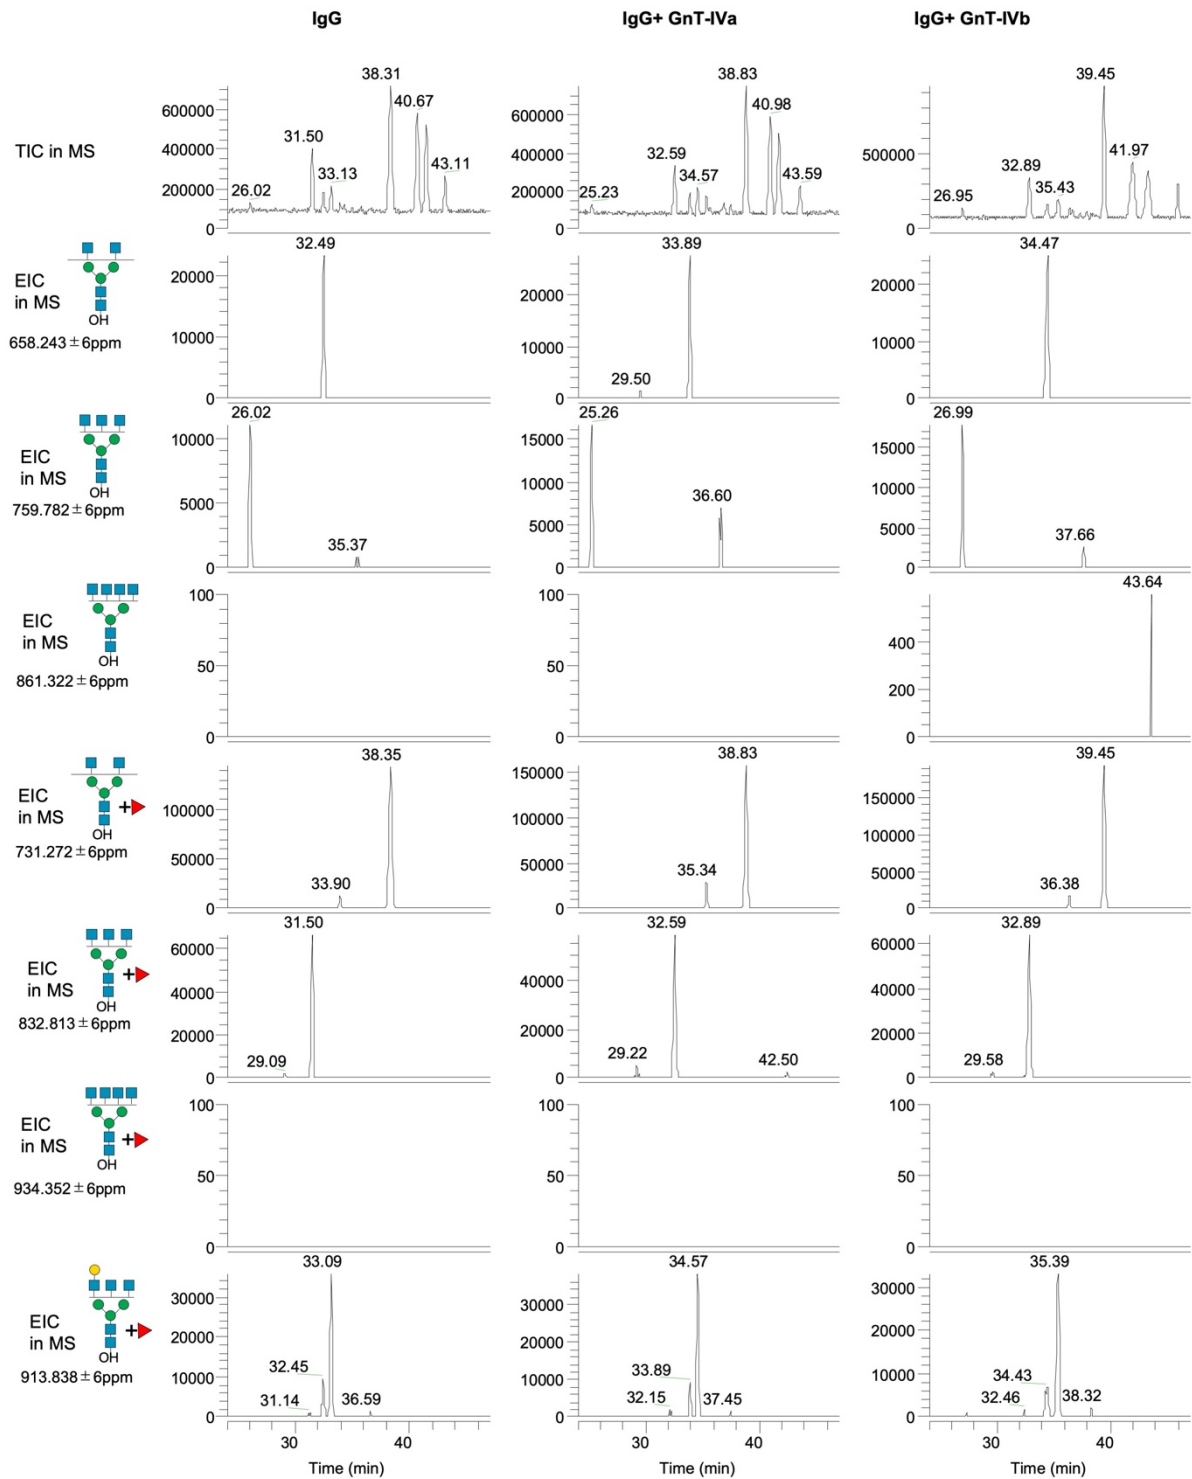

**Figure S1. LC-MS analysis of *N*-glycans derived from six glycoproteins.** Total ion chromatogram (TIC) and extracted ion chromatograms (EICs) of the major *N*-glycans from glycoproteins used in UDP-Glo assay which had been desialylated and degalactosylated. *A.* Transferrin. *B.*  $\alpha$ 1AGP. *C.* Fibrinogen. *D.* Haptoglobin. *E.*  $\alpha$ 1antitrypsin. *F.* IgG.

Figure S2

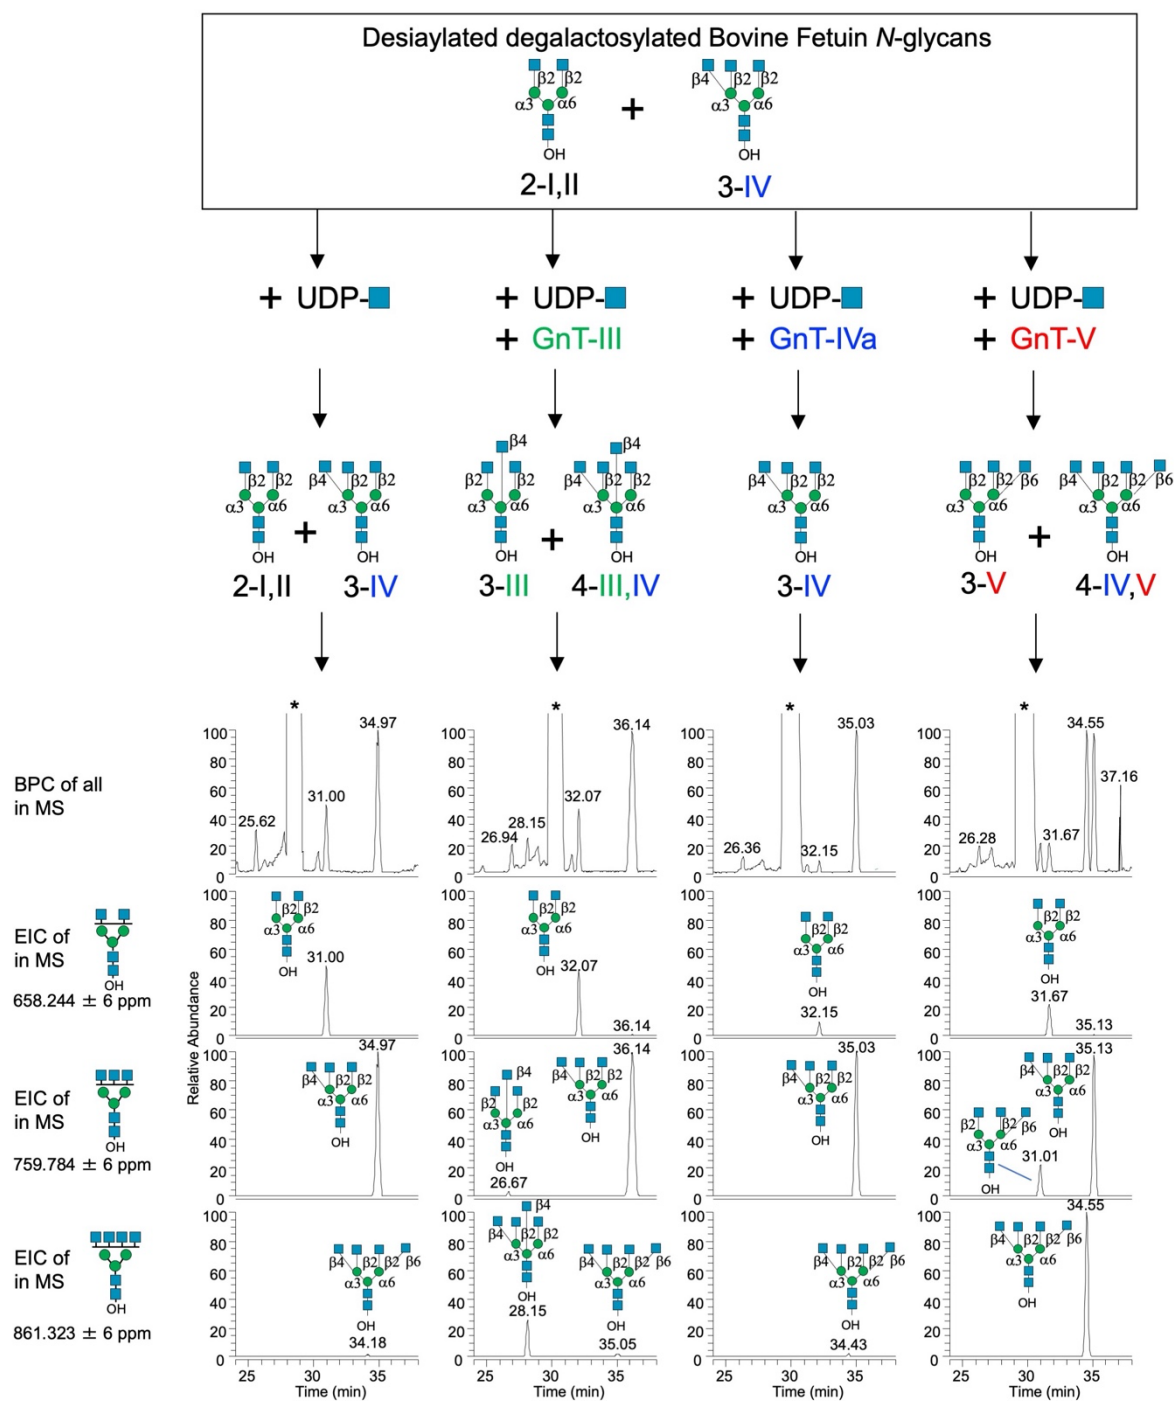

**Figure S2. LC-MS analysis of the standard N-glycans having defined GlcNAc branches derived from bovine fetuin.** The standard tri- and tetra-antennary N-glycans having different GlcNAc branches were enzymatically formed from the bi- and tri-antennary glycans of bovine fetuin using purified GnT-III, -IVa, and -V. EICs of the standard glycans with 2, 3, and 4 HexNAc residues (HexNAc in chitobiose is excluded) from LC-MS analysis are shown. Asterisks indicate UDP-GlcNAc used for the enzyme reactions.



Figure S3

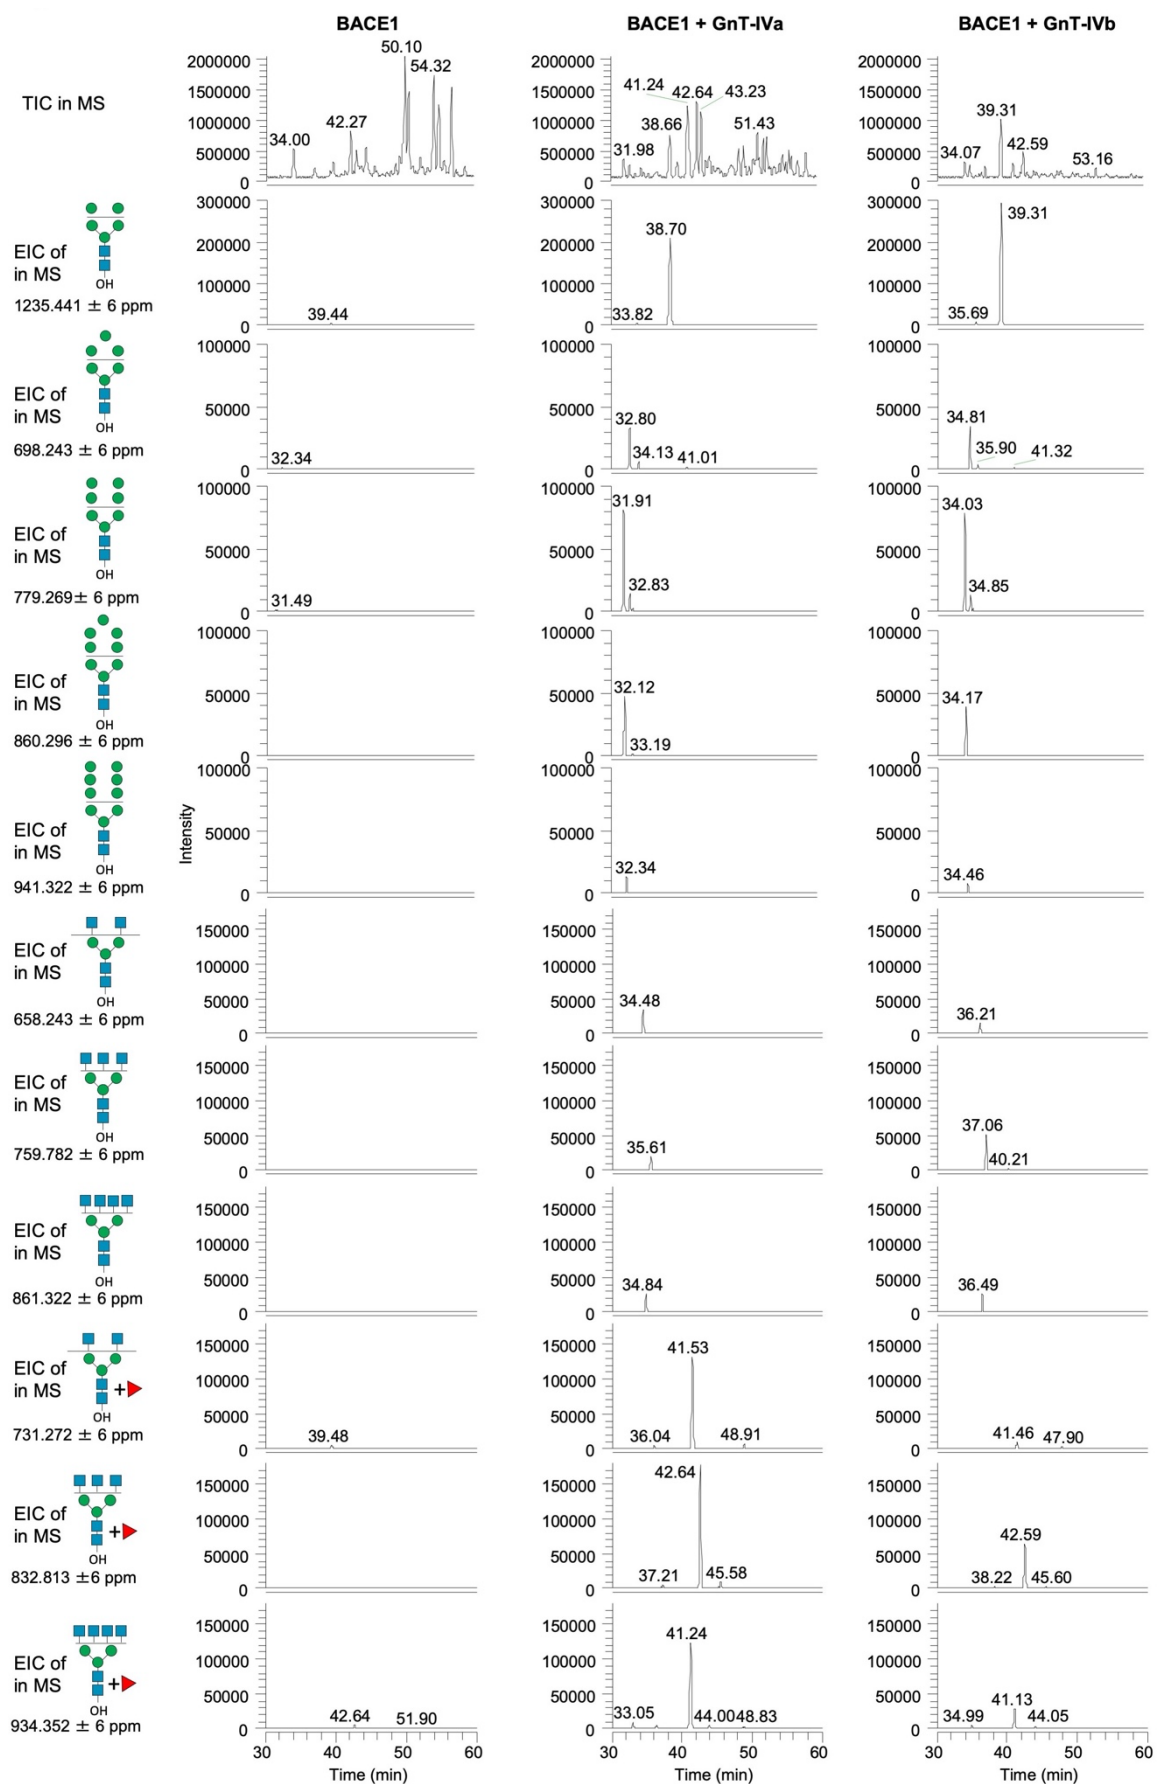

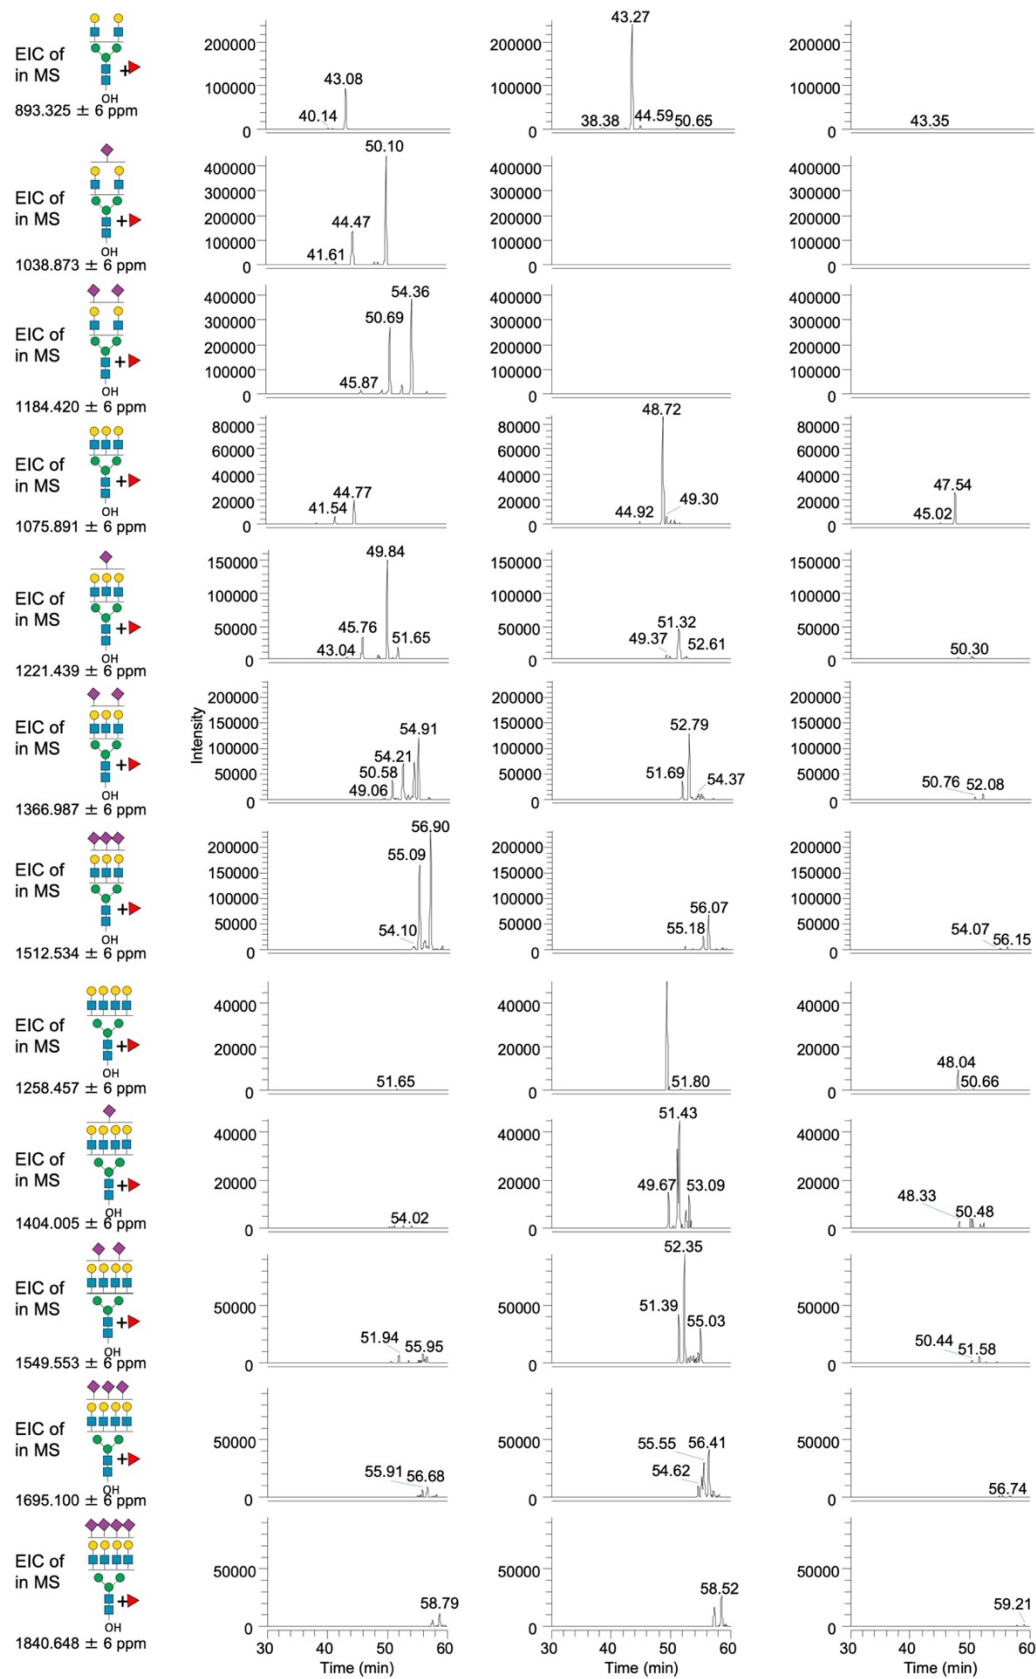

Figure S3. LC-MS analysis of *N*-glycans derived from BACE1 co-expressed with GnT-IVa or GnT-IVb. extracted ion chromatograms (EICs) of the major *N*-glycans.

Figure S4

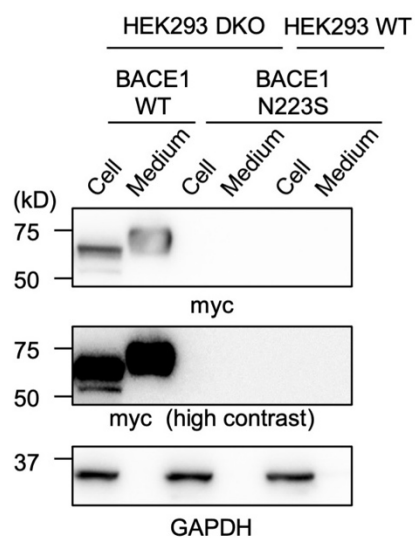

**Figure S4. Expression of BACE1 $\Delta$ TM WT and N223S mutant.** HEK293 DKO or WT cells were transfected with the plasmids for expression of BACE1 $\Delta$ TM WT or N223S mutant. Cell lysates (Cell) and secreted proteins in culture media purified with Ni<sup>2+</sup>-beads (Medium) were subjected to SDS-PAGE and blotted with the anti-myc antibody (upper) and anti-GAPDH antibody (lower).

Figure S5

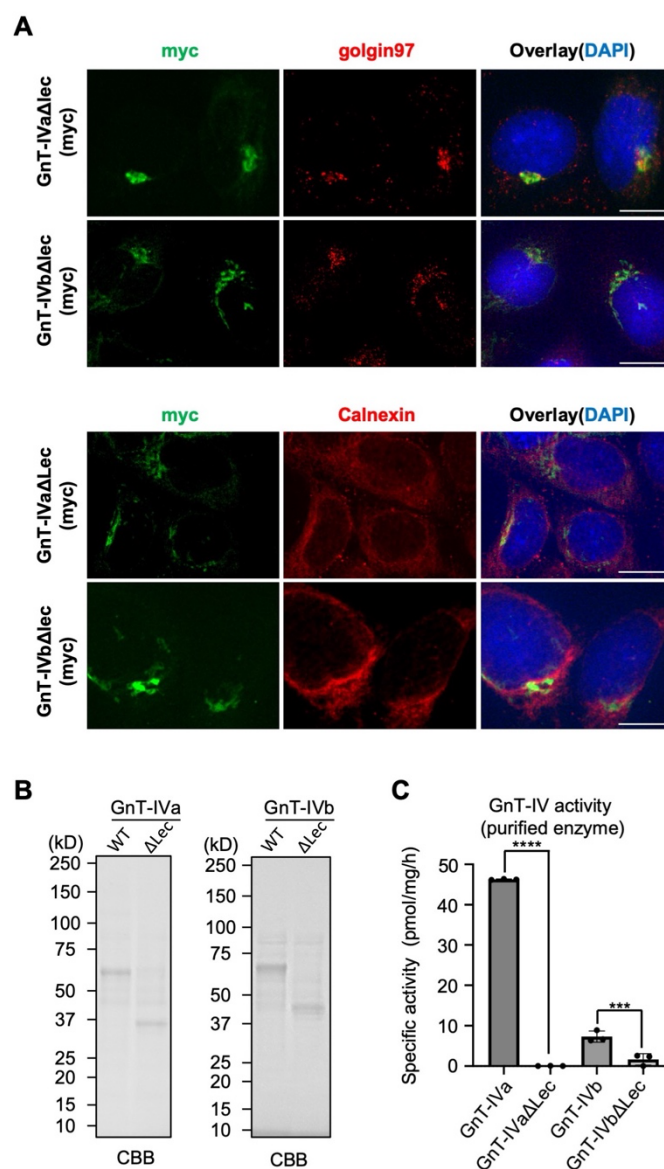

**Figure S5. Localization, expression and activity of  $\Delta$ lec mutants.** *A*, DKO cells transfected with a plasmid for expression of GnT-IVa $\Delta$ lec or GnT-IVb $\Delta$ lec were stained with anti-myc (green), antibodies for marker proteins (golgin-97 for the Golgi or Calnexin for the ER) (red), and DAPI (blue). Scale bar, 10  $\mu$ m. *B*, soluble GnT-IVa $\Delta$ lec and -IVb $\Delta$ lec were expressed in COS7 cells and purified from the media using a Ni<sup>2+</sup>-column. Purified GnT-IVa $\Delta$ lec and -IVb $\Delta$ lec were separated by SDS-PAGE and visualized by CBB staining. *C*, The specific activity of the purified GnT-IVa $\Delta$ lec and -IVb $\Delta$ lec ( $n = 3$ , means  $\pm$  S.D., \*\*\* $p < 0.001$ , \*\*\*\* $p < 0.0001$ , Tukey's multiple comparisons test).

Figure S6

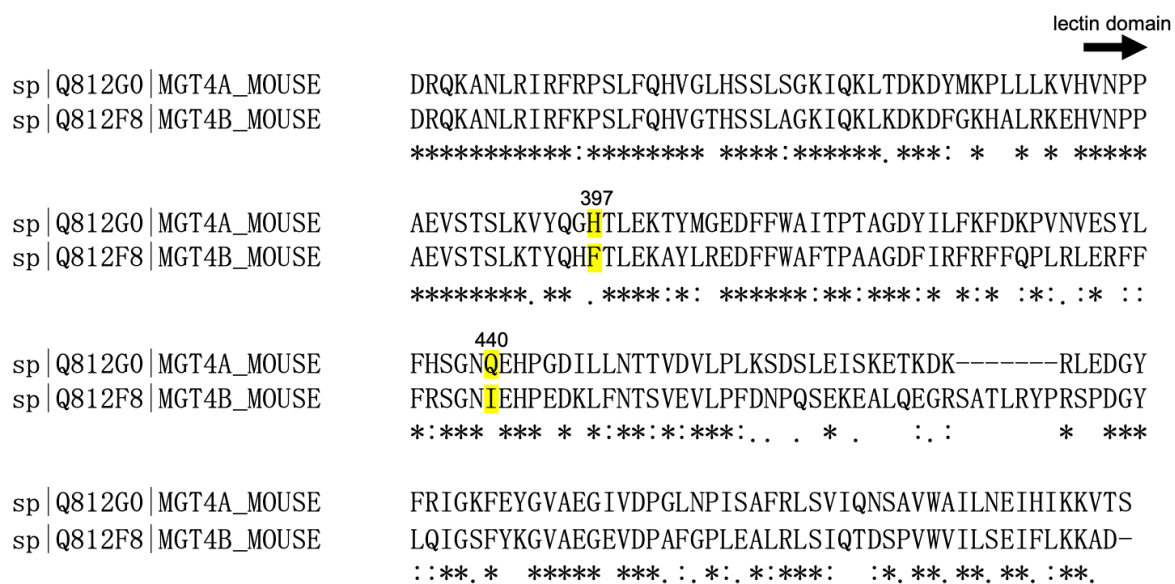

**Figure S6. Sequence comparison of mouse GnT-IVa and GnT-IVb lectin domains.** Sequence alignment of murine GnT-IVa and -IVb lectin domains. Amino acid residues mutated in Fig. 5 are highlighted in yellow.

## Figure S7

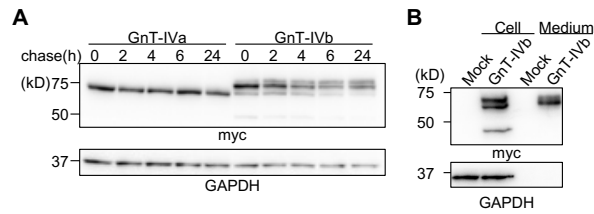

**Figure S7. Degradation rate and secretion of GnT-IVb.** *A*, DKO cells transfected with GnT-IVa or -IVb were chased for the indicated times in the presence of cycloheximide. Cell lysates were blotted with anti-myc (upper) and anti-GAPDH (lower) antibodies. *B*, proteins from mock-treated DKO cells transfected with an empty vector (Mock) or a plasmid for expression of GnT-IVb (Cell) and secreted GnT-IVb purified with Ni<sup>2+</sup>-beads (Medium) were subjected to SDS-PAGE and blotted with anti-myc antibody (upper), anti-GAPDH antibody (lower).

Table S1.

| Glycoprotein              | Uniprot number | Function                                         | N-glycosylation sites | Site occupancy                                                             | Glycan species                                                                                                                     |
|---------------------------|----------------|--------------------------------------------------|-----------------------|----------------------------------------------------------------------------|------------------------------------------------------------------------------------------------------------------------------------|
| Alpha-1-acid glycoprotein | P02763; P19652 | Transport of lipophilic compounds                | Overall               |                                                                            | A3G3S3 (33.5 %); A4G4S4 (19.5 %); A3FG3S3 (9 %); A4G4S3 (8.2 %); A3G3S2 (5 %); A2G2S2 (4.5 %); A4G4S2 (4 %); A4FG4S4 (2.5 %)       |
|                           |                |                                                  | Asn33                 |                                                                            | A3G3S3 (60 %); A3FG3S3 (20 %); A3G3S2 (12.5 %)                                                                                     |
|                           |                |                                                  | Asn56                 |                                                                            | A3G3S3 (55 %); A2G2S2 (22.5 %); A3FG3S3 (12.5 %); A3G3S2 (10 %)                                                                    |
|                           |                |                                                  | Asn72                 |                                                                            | A4G4S4 (30 %); A4G4S3 (15 %); A3G3S3 (15 %); A4G4S2 (10 %); A4FG4S3 (5 %); A4FG4S4 (5 %)                                           |
|                           |                |                                                  | Asn93                 |                                                                            | A4G4S4 (22.5 %); A4G4S3 (20 %); A3G3S3 (17.5 %); A4FG4S4 (7.5 %); A4FG3S3 (7.5 %); A3FG3S3 (7.5 %); A4G4S2 (7.5 %)                 |
|                           |                | Asn103                                           |                       | A4G4S4 (45 %); A3G3S3 (20 %); A4G4S2 (10 %); A4G4S3 (7.5 %); A3FG3S3 (5 %) |                                                                                                                                    |
| Alpha-1-antitrypsin       | P01009         | Serine protease inhibitor                        | Overall               |                                                                            | A2G2S2 (81 %); A3G3S3 (9.8 %); A3FG3S3 (5.6 %); FA2G2S2 (3.6 %)                                                                    |
|                           |                |                                                  | Asn70                 |                                                                            | A2G2S2 (91.3 %); FA2G2S2 (8.6 %)                                                                                                   |
|                           |                |                                                  | Asn107                |                                                                            | A2G2S2 (52.5 %); A3G3S3 (29.5 %); A3FG3S3 (16.7 %); FA2G2S2 (1.5 %)                                                                |
|                           |                | Asn271                                           |                       | A2G2S2 (99.3 %); FA2G2S2 (0.7 %)                                           |                                                                                                                                    |
| Fibrinogen                |                | Coagulation (platelet aggregation)               | Overall               |                                                                            | A2G2S1(6) (53 %); A2G2S2(6) (33 %)                                                                                                 |
| Fibrinogen alpha-chain    | P02671         |                                                  | Asn453                | 0%                                                                         | —                                                                                                                                  |
|                           |                |                                                  | Asn686                | 0%                                                                         | —                                                                                                                                  |
| Fibrinogen beta-chain     | P02675         |                                                  | Asn394                |                                                                            | <b>A2G2S1(6)</b> ; A2G2S2(6)                                                                                                       |
| Fibrinogen gamma-chain    | P02679         |                                                  | Asn78                 |                                                                            | <b>A2G2S1(6)</b> ; A2G2S2(6)                                                                                                       |
|                           |                |                                                  | Asn334                |                                                                            | <b>A2G2S1(6)</b> ; A2G2S2(6)                                                                                                       |
| Haptoglobin               | P00738         | Scavenger of hemoglobin                          | Overall               |                                                                            | A2G2S2 (45 %); A2G2S1 (26 %); A3G3S3 (9 %); A3FG3S3 (6 %); A3G3S2 (5 %); A3G3S1 (5 %); A2FG2S1 (2 %); A2FG2S2 (1 %)                |
|                           |                |                                                  | Asn184                | 97.70%                                                                     | A2G2S2 (46 %); A2G2S1 (38 %); A3G3S3 (4 %); A3G3S2 (3 %); A3G3S1 (2 %); A2FG2S2 (3 %); A2FG2S1 (3 %); A3FG3S3 (1 %)                |
|                           |                |                                                  | Asn207                | 97.40%                                                                     | A2G2S2 (47 %); A2G2S1 (39 %); A3G3S1 (7 %); A4G4S1 (2 %); A3FG3S1 (2 %); A4G4S2 (1 %); A2FG2S1 (1 %); A2FG2S2 (1 %)                |
|                           |                |                                                  | Asn211                | 98.50%                                                                     | A2G2S2 (40 %); A3G3S3 (29 %); A3FG3S3 (21 %); A3G3S2 (10 %)                                                                        |
|                           |                |                                                  | Asn241                | 95.80%                                                                     | A2G2S2 (47 %); A2G2S1 (26 %); A3G3S1 (10 %); A3G3S2 (8 %); A3G3S3 (4 %); A2FG2S1 (2 %); A2FG2S2 (1 %); A3FG3S2 (1 %); A4G4S1 (1 %) |
| Serotransferrin           | P02787         | Iron transport                                   | Overall               |                                                                            | A2G2S2 (96.5 %); FA2G2S2 (2.5 %); A3G3S2 (1 %)                                                                                     |
|                           |                |                                                  | Asn432                |                                                                            | A2G2S2 (93.5 %); A3G3S2 (2.5 %); A2G2S1 (2.4 %); A2FG2S2 (1.6 %)                                                                   |
|                           |                |                                                  | Asn491                | 2%                                                                         | A2G2S2 (100 %)                                                                                                                     |
|                           |                | Minor Asn-X-Cys site                             | Asn630                |                                                                            | A2G2S2 (85.9 %); FA2G2S2 (6.9 %); A2FG2S2 (2.8 %); A2G2S1 (2.2 %); A3G3S2 (1.0 %); FA3G3S2 (0.9 %); FA2FG2S2 (0.3 %)               |
| Immunoglobulin G          |                | Immunity (primary; secondary; complement system) | Overall               |                                                                            | FA2G1 (31 %); FA2G2 (23 %); FA2G2S1 (13 %); FA2 (10 %); FA2BG1 (5 %)                                                               |
| Immunoglobulin G1         | P01857         |                                                  | Asn180                |                                                                            |                                                                                                                                    |
| Immunoglobulin G2         | P01859         |                                                  | Asn176                |                                                                            |                                                                                                                                    |
| Immunoglobulin G3         | P01860         |                                                  | Asn227                |                                                                            |                                                                                                                                    |
|                           |                |                                                  | Asn322                |                                                                            |                                                                                                                                    |
| Immunoglobulin G4         | P01861         |                                                  | Asn177                |                                                                            |                                                                                                                                    |

Summary of the *N*-glycan structures of the 6 human serum glycoproteins used for the enzyme assay. This table was modified from a previous paper (Clerc et al., *Glycoconj. J.*, 2016, 33, 309-343).

Table S4.

| Plasmid name                  | Forward primer                                 | Reverse primer                          |
|-------------------------------|------------------------------------------------|-----------------------------------------|
| mGnT-IVb                      | ggggagATGAGGCTCCGCAATGGCA                      | acccttgaagcctTAGTCGGCC                  |
| mGnT-IVb-myc                  | TTTGAATTCgccaccATGAGGCTCCGCAATGGCAC            | TTTCTCGAGGTCGGCCTTTTTCAGAAAGA           |
| mGnT-IVb-A1                   | -                                              | TGGGTCAGTCTCGGCGATCA                    |
| mGnT-IVb-S1                   | TGATCGCCGAGACTGACCCA                           | -                                       |
| mGnT-IVb-S2                   | CCAGCATGTGGCACTCACT                            | -                                       |
| GnT-IVa $\Delta$ Lec          | TGTGGGGCCGgccaccATGAGGCTCCGAA                  | TTTCTCGAGCACGTGGACCTTGAGAAGCA           |
| GnT-IVb $\Delta$ Lec          | TTTGAATTCgccaccATGAGGCTCCGCAATGGCAC            | TTTCTCGAGCACGTGCTCCTCCGGAGAG            |
| GnT-IVa-Lec(b)                | TCAAGGTCCACGTGCTCGAGAACCCACCGCAGAGGTGAG        | AAGGGCCCTTAGACTCGAGGTCGGCCTTTTTCAGAAAGA |
| GnT-IVb-Lec(a)                | GGAAGGAGCACGTGCTCGAGAACCCGCTGCAGAGGTCTC        | AAGGGCCCTTAGACTCGAGACTGGTGACTTTTTTAATAT |
| pcDNA-IH/GnT-IVb              | GCTCCAAGGAGCTAAACCTG                           | TTTCTCGAGCTAGTCGGCCTTTTTCAGAA           |
| pcDNA-IH/GnT-IVb Phe413His    | CCTCAAGACGTACCAGCATcacACCCTGGAGAAAGGCCTACT     | Complementary                           |
| pcDNA-IH/GnT-IVb Ile456Glu    | CTTCTCCGAAGCGGGAACcaagAGCACCCGGAAGATAAGC       | Complementary                           |
| pcDNA-IH/GnT-IVb $\Delta$ lec | GCTCCAAGGAGCTAAACCTG                           | TTTCTCGAGGCCCGCCAGTGATGAGTGAG           |
| BACE1 Asn153Ser               | TAAGCATCCCCATGGCCCCagcGTCACGTGCGTGCCAACAT      | Complementary                           |
| BACE1 Asn172Ser               | AATCAGACAAGTTCTTCATCagGGCTCCAACATGGGAAGGCATC   | Complementary                           |
| BACE1 Asn223Ser               | TTGTGGTGCTGGCTTCCCCCTCagcCAGTCTGAAGTGTGGCCTCTG | Complementary                           |
| BACE1 Asn354Ser               | ACCTAATGGGTGAGGTTACCagcCAGTCCTCCGCATCACCAT     | Complementary                           |

Primers used in this study.
